# Supplementary material for: Zoonotic Mycobacterium bovis–induced Tuberculosis in Humans
Source: PubMed Central journal article supplement (PMC4816377; doi:10.3201/eid1906.120543), 2013-06
Supplement: 12-0543-Techapp-s1.pdf [file 12-0543-Techapp-s1.pdf]

# Zoonotic *Mycobacterium bovis*–induced Tuberculosis in Humans

## Technical Appendix 1

Technical Appendix 1 Table 1. Searched bibliographic databases

| Database                                             | URL                                                                                                                                                                    | No. articles | Search syntax | Search date | Region                      | Comments                    |
|------------------------------------------------------|------------------------------------------------------------------------------------------------------------------------------------------------------------------------|--------------|---------------|-------------|-----------------------------|-----------------------------|
| PubMed/MEDLINE                                       | <a href="http://www.ncbi.nlm.nih.gov/pubmed/">http://www.ncbi.nlm.nih.gov/pubmed/</a>                                                                                  | 7767         | complete      | 21/04/2010  | International               |                             |
| ISI Web of Knowledge                                 | <a href="http://isiwebofknowledge.com/">http://isiwebofknowledge.com/</a>                                                                                              | 8324         | complete      | 22/04/2010  | International               |                             |
| Popline                                              | <a href="http://www.popline.org/">http://www.popline.org/</a>                                                                                                          | 70           | complete      | 21/04/2010  | International               |                             |
| CAB Abstracts and Global Health                      | <a href="http://www.cabdirect.org/">http://www.cabdirect.org/</a>                                                                                                      | 27           | complete      | 06/05/2010  | International               |                             |
| ProMed                                               | <a href="http://www.promedmail.org">http://www.promedmail.org</a>                                                                                                      | 241          | modified      | 28/04/2010  | International               |                             |
| The Cochrane Library                                 | <a href="http://www.thecochranelibrary.com">http://www.thecochranelibrary.com</a>                                                                                      | 11           | complete      | 21/04/2010  | International               |                             |
| BIOLINE                                              | <a href="http://www.bioline.org.br">http://www.bioline.org.br</a>                                                                                                      | 32           | modified      | 29/04/2010  | International               |                             |
| WHOLIS                                               | <a href="http://www.bireme.br">http://www.bireme.br</a>                                                                                                                | 17           | complete      | 06/05/2010  | International               |                             |
| Health Information Locator                           | <a href="http://www.bireme.br">http://www.bireme.br</a>                                                                                                                | 3            | complete      | 06/05/2010  | International               |                             |
| Institute of Tropical Medicine, Antwerp, Belgium     | <a href="http://lib.itg.be:8000/webspirs/start.ws">http://lib.itg.be:8000/webspirs/start.ws</a>                                                                        | 14           | complete      | 05/05/2010  | International               |                             |
| King's Fund Information & Library Service            | <a href="http://www.kingsfund.org.uk/library/">http://www.kingsfund.org.uk/library/</a><br><a href="http://kingsfund.koha-ptfs.eu/">http://kingsfund.koha-ptfs.eu/</a> | 0            | modified      | 21/04/2010  | International               | Grey literature             |
| African Journals Online                              | <a href="http://ajol.info/">http://ajol.info/</a>                                                                                                                      | 691          | modified      | 05/05/2010  | Africa                      |                             |
| African Index Medicus                                | <a href="http://indexmedicus.afro.who.int/">http://indexmedicus.afro.who.int/</a>                                                                                      | 0            | modified      | 21/04/2010  | Africa                      |                             |
| Afro Library                                         | <a href="http://afrolib.afro.who.int/">http://afrolib.afro.who.int/</a>                                                                                                | 0            | modified      | 21/04/2010  | Africa                      |                             |
| Latin American and Caribbean Health Science MedCarib | <a href="http://www.bireme.br">http://www.bireme.br</a>                                                                                                                | 24           | complete      | 06/05/2010  | Caribbean                   |                             |
| REPDISCA                                             | <a href="http://www.bireme.br">http://www.bireme.br</a>                                                                                                                | 1            | complete      | 06/05/2010  | Latin America and Caribbean |                             |
| PAHO                                                 | <a href="http://www.bireme.br">http://www.bireme.br</a>                                                                                                                | 35           | complete      | 06/05/2010  | Pan-America                 |                             |
| IBECS                                                | <a href="http://www.bireme.br">http://www.bireme.br</a>                                                                                                                | 94           | complete      | 06/05/2010  | Spanish literature          |                             |
| CUIDEN                                               | <a href="http://www.index-f.com/">http://www.index-f.com/</a>                                                                                                          | 2            | modified      | 05/05/2010  | Spanish literature          |                             |
| HELLIS                                               | <a href="http://www.hellis.org/">http://www.hellis.org/</a>                                                                                                            | 0            | modified      | 21/04/2010  | Asia                        |                             |
| Index Medicus for the South-East Asia Region         | <a href="http://www.who.int/library/databases/searo/en/index.html">http://www.who.int/library/databases/searo/en/index.html</a>                                        | 82           | modified      | 29/04/2010  | South-East Asia             |                             |
| Western Pacific Region Index Medicus                 | <a href="http://www.who.int/library/databases/wpro/en/index.html">http://www.who.int/library/databases/wpro/en/index.html</a>                                          | 71           | modified      | 29/04/2010  | Western Pacific             |                             |
| Indian Medlars Center - IndMed                       | <a href="http://indmed.nic.in/">http://indmed.nic.in/</a>                                                                                                              | 22           | modified      | 03/05/2010  | Indian literature           |                             |
| KoreaMed                                             | <a href="http://www.koreamed.org/SearchBasic.php">http://www.koreamed.org/SearchBasic.php</a>                                                                          | 79           | modified      | 03/05/2010  | Korean literature           |                             |
| Japan Science and Technology Information Aggregator  | <a href="http://www.jstage.jst.go.jp/browse/">http://www.jstage.jst.go.jp/browse/</a>                                                                                  | 309          | modified      | 05/05/2010  | Japanese literature         |                             |
| Health Research and Development Information Network  | <a href="http://www.herdin.ph/">http://www.herdin.ph/</a>                                                                                                              | 4            | modified      | 03/05/2010  | Philippine literature       |                             |
| Index Medicus for the Eastern Mediterranean Region   | <a href="http://www.who.int/library/databases/emro/en/index.html">http://www.who.int/library/databases/emro/en/index.html</a>                                          | 8            | modified      | 28/04/2010  | Eastern Mediterranean       |                             |
| Panteleimon                                          | <a href="http://www.panteleimon.org/maine.php3">www.panteleimon.org/maine.php3</a>                                                                                     | 8            | modified      | 03/05/2010  | Russian literature          |                             |
| l'Ecole Nationale de la Santé Publique               | <a href="http://www.bdsp.ehesp.fr/Base/">http://www.bdsp.ehesp.fr/Base/</a>                                                                                            | 48           | complete      | 05/05/2010  | French literature           | Additional search in French |
| La Bibliothèque de Santé                             | <a href="http://www.santetropicale.com/resum">http://www.santetropicale.com/resum</a>                                                                                  | 1            | modified      | 05/05/2010  | Tropics,                    | Additional                  |

| Database                                            | URL                | No. articles | Search syntax | Search date | Region            | Comments               |
|-----------------------------------------------------|--------------------|--------------|---------------|-------------|-------------------|------------------------|
| Tropicale                                           | e/catalogue.asp    |              |               |             | French literature | search in French       |
| System for Information on Grey Literature in Europe | opensigle.inist.fr | 4            | complete      | 06/05/2010  | Europe            | French Grey literature |
| Total                                               | N/A                | 12176        | N/A           | N/A         | N/A               |                        |

Search syntax: Depending on whether or not the search engine did allow for the use of Boolean operators a complete or modified search syntax was used (Appendix Table 2).

Total: Sum of records after removal of identified duplicates.

Technical Appendix 1 Table 2. Search terms used to identify potentially relevant reports

| A:                      | B:           |
|-------------------------|--------------|
| "bovine tuberculosis"   | "zoonotic"   |
| "bovine TB"             | "zoonosis"   |
| "BTB"                   | "patient"    |
| "zoonotic tuberculosis" | "patients"   |
| "zoonotic TB"           | "cohort"     |
| "animal tuberculosis"   | "population" |
| "animal TB"             | "person"     |
| "Mycobacterium bovis"   | "persons"    |
| "M. bovis"              | "people"     |
| "scrofula"              | "child"      |
| "Pott's disease"        | "children"   |
| "lupus vulgaris"        | "adult"      |
|                         | "adults"     |
|                         | "woman"      |
|                         | "women"      |
|                         | "man"        |
|                         | "men"        |
|                         | "human"      |
|                         | "humans"     |

Potentially relevant reports were identified using the search tools of the respective bibliographic databases (Technical Appendix Table 1). The search syntax was adapted to the different search tools. At least one of the search terms under A had to be present in connection with at least one of the terms under B. The most sensitive search settings had been applied. If the respective search tool did not allow for the use of Boolean operators, all reports that were retrieved for any of the search terms under A were used. Search terms were translated into French for searches in French literature databases (Technical Appendix Table 1).

Technical Appendix 1 Table 3. Countries of all World Health Organization regions

| Countries in the WHO African Region | Countries in the WHO Region of the Americas | Countries in WHO South-East Asia Region | Countries in the WHO European Region | Countries in the WHO Eastern Mediterranean Region | Countries in the WHO Western Pacific Region |
|-------------------------------------|---------------------------------------------|-----------------------------------------|--------------------------------------|---------------------------------------------------|---------------------------------------------|
| Algeria                             | Antigua and Barbuda                         | Bangladesh                              | Albania                              | Afghanistan                                       | Australia                                   |
| Angola                              | Argentina                                   | Bhutan                                  | Andorra                              | Bahrain                                           | Brunei Darussalam                           |
| Benin                               | Bahamas                                     | Democratic People's Republic of Korea   | Armenia                              | Djibouti                                          | Cambodia                                    |
| Botswana                            | Barbados                                    | India                                   | Austria                              | Egypt                                             | China                                       |
| Burkina Faso                        | Belize                                      | Indonesia                               | Azerbaijan                           | Iran (Islamic Republic of)                        | Cook Islands                                |
| Burundi                             | Bolivia (Plurinational State of)            | Maldives                                | Belarus                              | Iraq                                              | Fiji                                        |
| Cameroon                            | Brazil                                      | Myanmar                                 | Belgium                              | Jordan                                            | Japan                                       |
| Cape Verde                          | Canada                                      | Nepal                                   | Bosnia and Herzegovina               | Kuwait                                            | Kiribati                                    |
| Central African Republic            | Chile                                       | Sri Lanka                               | Bulgaria                             | Lebanon                                           | Lao People's Democratic Republic            |
| Chad                                | Colombia                                    | Thailand                                | Croatia                              | Libya                                             | Malaysia                                    |
| Comoros                             | Costa Rica                                  | Timor-Leste                             | Cyprus                               | Morocco                                           | Marshall Islands                            |

| Countries in the WHO African Region | Countries in the WHO Region of the Americas | Countries in WHO South-East Asia Region | Countries in the WHO European Region      | Countries in the WHO Eastern Mediterranean Region | Countries in the WHO Western Pacific Region |
|-------------------------------------|---------------------------------------------|-----------------------------------------|-------------------------------------------|---------------------------------------------------|---------------------------------------------|
| Congo                               | Cuba                                        |                                         | Czech Republic                            | Oman                                              | Micronesia (Federated States of)            |
| Côte d'Ivoire                       | Dominica                                    |                                         | Denmark                                   | Pakistan                                          | Mongolia                                    |
| Democratic Republic of the Congo    | Dominican Republic                          |                                         | Estonia                                   | Qatar                                             | Nauru                                       |
| Equatorial Guinea                   | Ecuador                                     |                                         | Finland                                   | Saudi Arabia                                      | New Zealand                                 |
| Eritrea                             | El Salvador                                 |                                         | France                                    | Somalia                                           | Niue                                        |
| Ethiopia                            | Grenada                                     |                                         | Georgia                                   | South Sudan                                       | Palau                                       |
| Gabon                               | Guatemala                                   |                                         | Germany                                   | Sudan                                             | Papua New Guinea                            |
| Gambia                              | Guyana                                      |                                         | Greece                                    | Syrian Arab Republic                              | Philippines                                 |
| Ghana                               | Haiti                                       |                                         | Hungary                                   | Tunisia                                           | Republic of Korea                           |
| Guinea                              | Honduras                                    |                                         | Iceland                                   | United Arab Emirates                              | Samoa                                       |
| Guinea-Bissau                       | Jamaica                                     |                                         | Ireland                                   | Yemen                                             | Singapore                                   |
| Kenya                               | Mexico                                      |                                         | Israel                                    |                                                   | Solomon Islands                             |
| Lesotho                             | Nicaragua                                   |                                         | Italy                                     |                                                   | Tonga                                       |
| Liberia                             | Panama                                      |                                         | Kazakhstan                                |                                                   | Tuvalu                                      |
| Madagascar                          | Paraguay                                    |                                         | Kyrgyzstan                                |                                                   | Vanuatu                                     |
| Malawi                              | Peru                                        |                                         | Latvia                                    |                                                   | Viet Nam                                    |
| Mali                                | Saint Kitts and Nevis                       |                                         | Lithuania                                 |                                                   |                                             |
| Mauritania                          | Saint Lucia                                 |                                         | Luxembourg                                |                                                   |                                             |
| Mauritius                           | Saint Vincent and the Grenadines            |                                         | Malta                                     |                                                   |                                             |
| Mozambique                          | Suriname                                    |                                         | Monaco                                    |                                                   |                                             |
| Namibia                             | Trinidad and Tobago                         |                                         | Montenegro                                |                                                   |                                             |
| Niger                               | United States of America                    |                                         | Netherlands                               |                                                   |                                             |
| Nigeria                             | Uruguay                                     |                                         | Norway                                    |                                                   |                                             |
| Rwanda                              | Venezuela (Bolivarian Republic of)          |                                         | Poland                                    |                                                   |                                             |
| Sao Tome and Principe               |                                             |                                         | Portugal                                  |                                                   |                                             |
| Senegal                             |                                             |                                         | Republic of Moldova                       |                                                   |                                             |
| Seychelles                          |                                             |                                         | Romania                                   |                                                   |                                             |
| Sierra Leone                        |                                             |                                         | Russian Federation                        |                                                   |                                             |
| South Africa                        |                                             |                                         | San Marino                                |                                                   |                                             |
| Swaziland                           |                                             |                                         | Serbia                                    |                                                   |                                             |
| Togo                                |                                             |                                         | Slovakia                                  |                                                   |                                             |
| Uganda                              |                                             |                                         | Slovenia                                  |                                                   |                                             |
| United Republic of Tanzania         |                                             |                                         | Spain                                     |                                                   |                                             |
| Zambia                              |                                             |                                         | Sweden                                    |                                                   |                                             |
| Zimbabwe                            |                                             |                                         | Switzerland                               |                                                   |                                             |
|                                     |                                             |                                         | Tajikistan                                |                                                   |                                             |
|                                     |                                             |                                         | The former Yugoslav Republic of Macedonia |                                                   |                                             |
|                                     |                                             |                                         | Turkey                                    |                                                   |                                             |
|                                     |                                             |                                         | Turkmenistan                              |                                                   |                                             |
|                                     |                                             |                                         | Ukraine                                   |                                                   |                                             |
|                                     |                                             |                                         | United Kingdom                            |                                                   |                                             |
|                                     |                                             |                                         | Uzbekistan                                |                                                   |                                             |

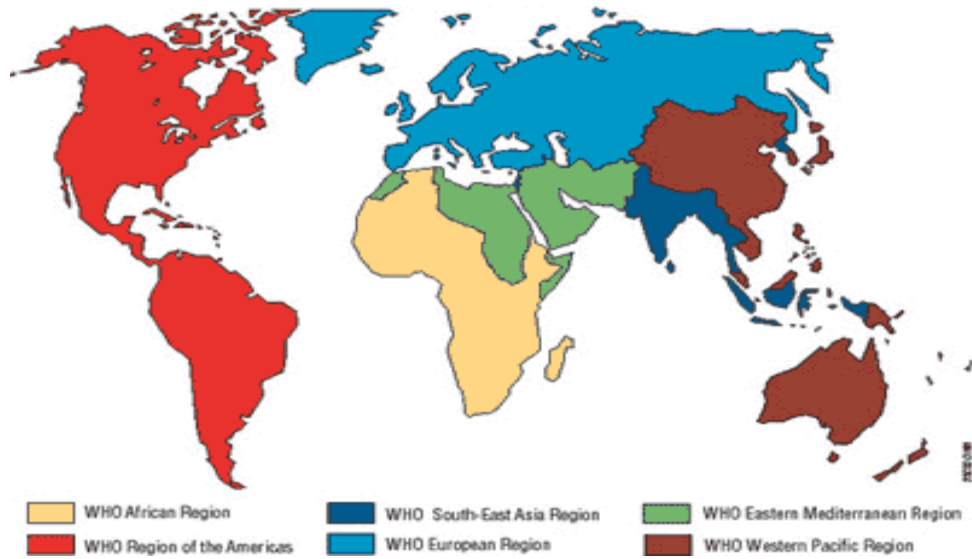

Technical Appendix 1 Figure 1. World Health Organization regions.

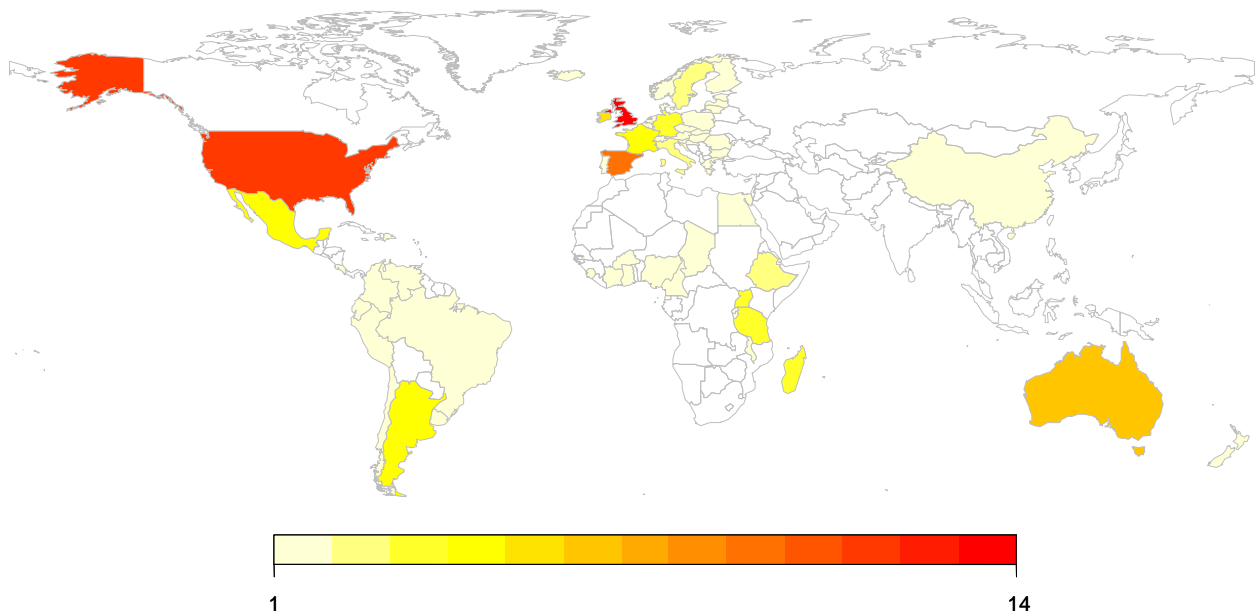

Technical Appendix 1 Figure 2. Heat map of the number of records used by country for the analyses herein performed.
